# Supplementary material
Source: PubMed Central journal article supplement (PMC10452043)
Supplement: NIHMS1894122-supplement-Supp1.pdf [file NIHMS1894122-supplement-Supp1.pdf]

# Intervention Survey

---

Date \_\_\_\_\_

---

Role of Caregiver Completing Survey

Mother  Father  Guardian, not mother or father  Other

---

Please specify.

\_\_\_\_\_

---

How was your experience with the car seat checks?

---

Have you received any education or assistance on child passenger safety or car seat use other than what you received with this research study?

Yes  
 No

---

Did you receive assistance in car seat installation (specifically) separate from that you received in this research study?

Yes  
 No

---

From where or whom did you receive assistance? (Choose all that apply)

- Medical provider (doctor or nurse)
- Car seat technician (separate from research study)
- Fire station or police department
- Store
- Internet source
- Friends or family
- Other

---

If other, please specify

\_\_\_\_\_

---

How confident are you in your ability to correctly install and use your child's car seat?

Very confident  
 Somewhat confident  
 Unsure (or Not too confident)  
 Not confident at all

---

Did your experience in this research study affect your confidence in your ability to install and use your child's car seat properly?

- Yes
- No

---

How did your confidence change as a result of this study?

- Increased confidence
- Decreased confidence

---

What did you find helpful about the car seat checks?

---

What did you find challenging (or not helpful) about the car seat checks?

---

How likely would you be to recommend a car seat program like this one to friends or family with infants and/or young children?

Not likely at all Very likely

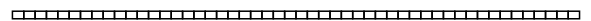

(Place a mark on the scale above)

---

Did you participate in the remote car seat checks using the video technology?

- Yes
- No

---

If offered, would you have been interested in receiving a remote car seat check using the video technology?

- Yes
- No
- Maybe

---

Which remote car seat checks did you participate in? (Check all that apply)

- 3 month
- 6 month
- 9 month

---

If you were not involved in a research study, would you participate in a program like this that offered car seat checks every 3 months?

- Yes
- No
- Maybe

---

Please share any other thoughts about your experience or suggestions for improvement.

---
