# Supplementary material
Source: PubMed Central journal article supplement (PMC10452043)
Supplement: NIHMS1894122-supplement-Supp2.pdf [file NIHMS1894122-supplement-Supp2.pdf]

# Follow-up Coding Sheet: LOWER ANCHOR, Rear-Facing

---

Record ID

---

---

Please Choose One:

- Infant Seat with base
- Infant Seat without base
- Convertible seat
- Other

---

If other, please specify

---

---

ID:

---

---

Which caregiver is present?

- Mother
- Father
- Both parents
- Other

---

If other, please specify

---

---

Date:

---

---

Tech Name & ID

- Alease Young T624669
- Chenille Holloman
- Jerusalem Anderson
- Karen Gay
- Cynthia Lightfoot
- Arlinda Page
- Other

---

If other, please specify name and tech ID

---

---

Please specify tech ID

---

---

Choose One:

- In person
- Remote/telemedicine

---

If remote, where is family located?

---

---

Child Age in Months:

---

---

Car Make/Model/Year

---

---

Did you provide resources on child passenger safety for siblings today?

- Yes
- No

If yes, choose all that apply:

- Inspection station schedule  
 General child passenger safety info  
 Answered a specific CPS question  
 Other

If other, please specify:

\_\_\_\_\_

Start time of call:

\_\_\_\_\_

End time of call:

\_\_\_\_\_

### Car Seat: As Per Manufacturer's Instructions

Is the car seat today the same one used for the last car seat check?

- Yes  
 No

Has the car seat been moved to a different car or different seating position in this car since the last car seat check?

- Yes  
 No

Car seat manufacturer

- Baby Trend  
 Chicco  
 Diono  
 Hauck  
 Recaro  
 Cybex, Evenflo  
 Dorel (Cosco, Eddie Bauer, Safety 1st, Maxi Cosi)  
 Britax  
 Uppa Baby  
 Graco  
 Clek  
 Peg Perego  
 Other

If other, please specify:

\_\_\_\_\_

Model #

\_\_\_\_\_

Manufacturer date

\_\_\_\_\_

Is car seat correct for child's height, weight, age and developmental level?

- Yes  
 No  
 Unknown

Has the car seat been in a crash?

- Yes  
 No  
 Unknown

---

Is the car seat expired?  Yes  
 No  
 Unknown

---

Is the car seat a make/model that is on recall?  Yes  
 No  
 Unknown

---

Does the car seat have all original parts present (e.g. padding)?  Yes  
 No  
 Unknown

---

Are any after market products or toys attached to the car seat?  Yes  
 No  
 Unknown

---

Are harness straps torn?  Yes  
 No  
 Unknown  
 N/A

---

Are harness straps frayed?  Yes  
 No  
 Unknown  
 N/A

---

Are harness straps damaged?  Yes  
 No  
 Unknown  
 N/A

---

Are all excess seat/harness strap lengths secured properly?  Yes  
 No  
 Unknown  
 N/A

---

### Car Seat Installation: As Per Manufacturer's Instructions

---

Is the car seat secured to the vehicle? (side to side) (does not move side to side at the belt path more than 1 inch)  Yes  
 No  
 Unknown

---

Is the car seat secured to the vehicle? (back & forth) (does not move back and forth at the belt path more than 1 inch)  Yes  
 No  
 Unknown

---

Is the car seat installed in front of an airbag?  Yes  
 No  
 Unknown

---

Is the car seat facing the correct direction?  Yes  
 No  
 Unknown  
 N/A

---

---

Is the recline angle correct?  Yes  
 No  
 Unknown  
 N/A

---

Is the carrying handle in correct position?  Yes  
 No  
 Unknown  
 N/A

---

Is the top tether strap on the car seat attached to the vehicle?  Yes  
 No  
 Unknown  
 N/A (rear facing seat)

---

Is the car seat the correct distance from the seat in front of it per manufacturer and vehicle instructions?  Yes  
 No  
 Unknown  
 N/A

---

### **Harness Straps: As Per Manufacturer's Instructions**

---

Are the harness straps threaded correctly behind the seat?  Yes  
 No  
 Unknown  
 N/A

---

Are the harness straps twisted?  Yes  
 No  
 Unknown  
 N/A

---

### **Anchors: As Per Manufacturer's Instructions**

---

Are both LATCH anchors and seat belt used at the same time?  Yes  
 No  
 Unknown

---

Are lower anchors attached properly?  Yes  
 No  
 Unknown

---

Are lower anchors attached to the approved anchor points (not the same one)?  Yes  
 No  
 Unknown

---

Are the lower anchor straps on the car seat threaded/routed correctly?  Yes  
 No  
 Unknown

---

Are the lower anchor straps on the car seat twisted?  Yes  
 No  
 Unknown

---

Does the combined weight of seat and child fit LATCH requirements?  Yes  
 No  
 Unknown

---

**Child positioning: As Per Manufacturer's Instructions**

Is the child present?  Yes  
 No

Are harness straps tight and snug around child's body?  Yes  
 No  
 Unknown

Is crotch strap tight and close to the child's body?  Yes  
 No  
 Unknown

Is chest clip at armpit level?  Yes  
 No  
 Unknown

Do shoulder harness straps start at or below child's shoulder height?  Yes  
 No  
 Unknown

Is the child's head within the confines of the car seat?  Yes  
 No  
 Unknown

Additional Comments:

---
